# Supplementary material
Source: PubMed Central journal article supplement (PMC3174004)
Supplement: cc1004_0680SD1.pdf [file cc1004_0680SD1.pdf]

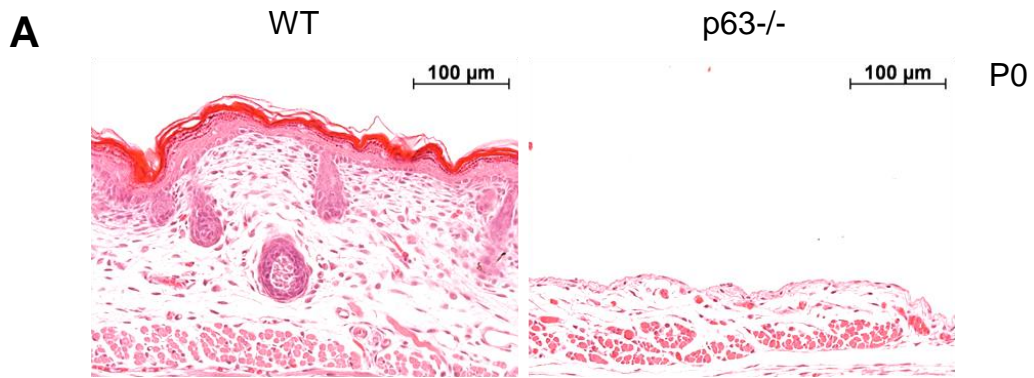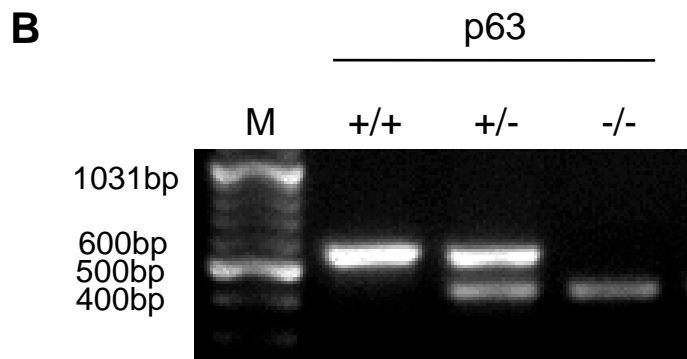

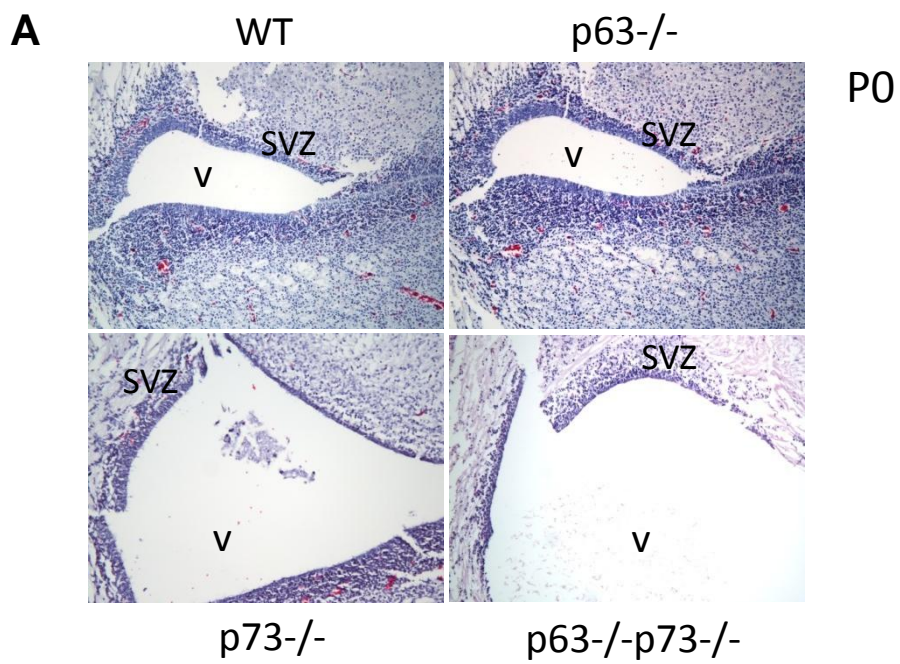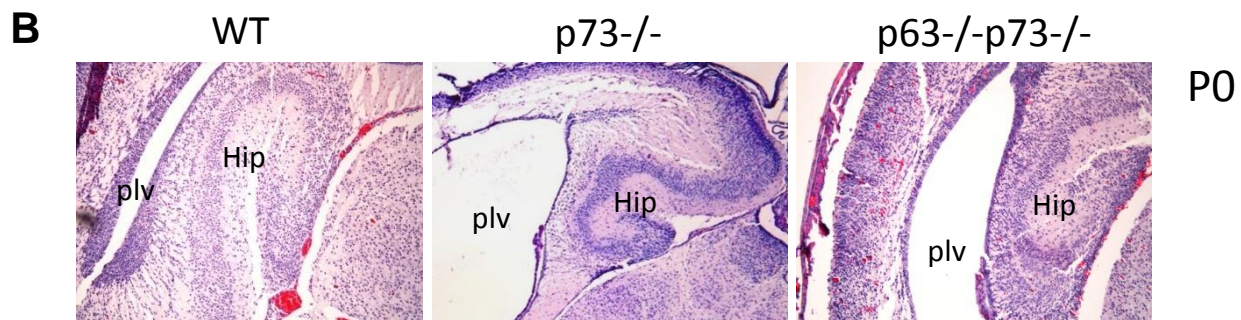

## **Supplemental Figure 1**

### **Validation of the skin phenotype and genotype of the p63<sup>-/-</sup> mice used in this study.**

- A) The absence of epidermis was confirmed in p63<sup>-/-</sup> newborns. Skin from WT and p63<sup>-/-</sup> mice (P0) stained with H&E.
- B) The genotype of p63<sup>+/+</sup>, p63<sup>+/-</sup> and p63<sup>-/-</sup> mice was confirmed by genomic PCR with primers corresponding to sequences surrounding the deleted region.

## **Supplemental Figure 2**

### **The phenotype of p63<sup>-/-</sup>-p73<sup>-/-</sup> mice is identical to that of p73<sup>-/-</sup> mice.**

Corresponding coronal sections of mouse brains from WT, p63<sup>-/-</sup>, p73<sup>-/-</sup> and p63<sup>-/-</sup>-p73<sup>-/-</sup> double knockout mice (DKO) at stage P0. The phenotype of DKO is identical to that of p73<sup>-/-</sup> mice<sup>5, 6</sup>. (A) SVZ around lateral ventricle. (B) Hippocampus and posterior lateral ventricle. H&E stainings.
